# Supplementary material for: Systematic increase of electrocatalytic turnover at nanoporous platinum surfaces prepared by atomic layer deposition
Source: Royal Society of Chemistry journal article supplement (doi:10.1039/c5ta00205b), 2015-01-01
Supplement: c5ta00205b1.pdf [file c5ta00205b1.pdf]

Supporting document to:

## **Systematic increase of electrocatalytic turnover at nanoporous platinum surfaces prepared by atomic layer deposition**

Loïc Assaud, Johannes Schumacher, Alexander Tafel, Sebastian Bochmann,  
Silke Christiansen, and Julien Bachmann

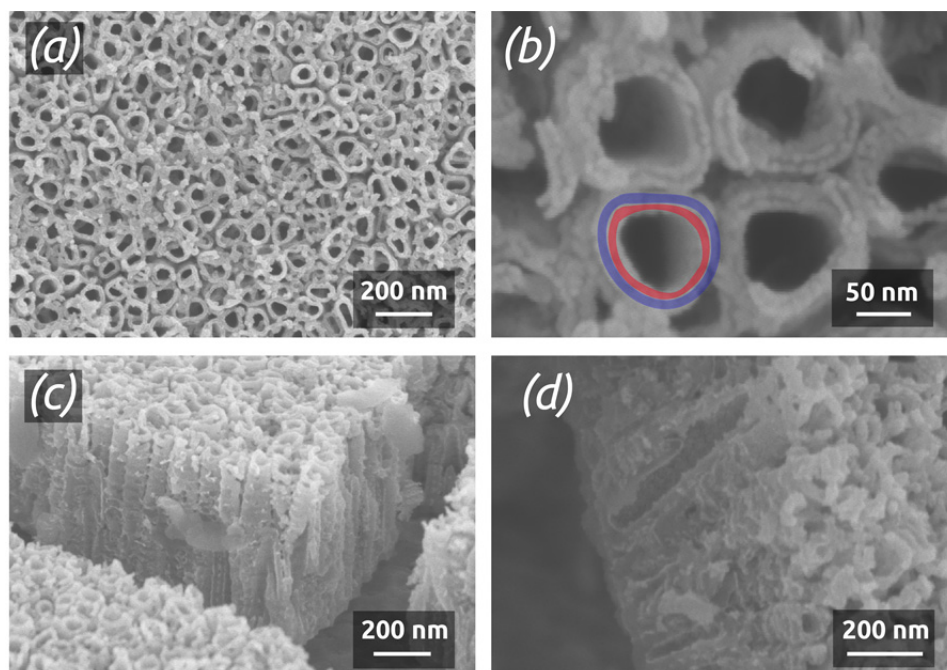

**Figure S1. Top views (a, b) and cross section (c, d) SEM micrographs of TiO<sub>2</sub> nanotubes coated by ALD with Pt.**

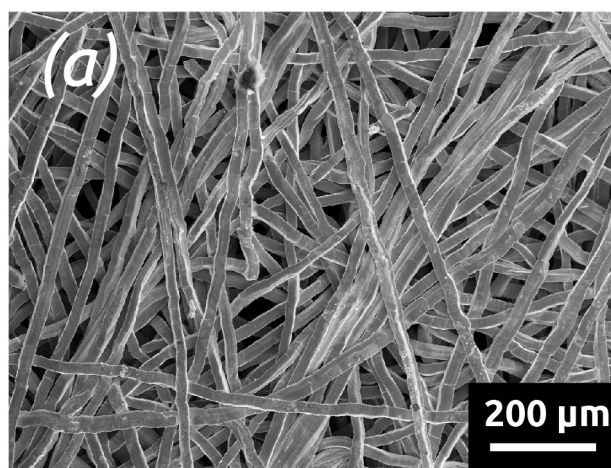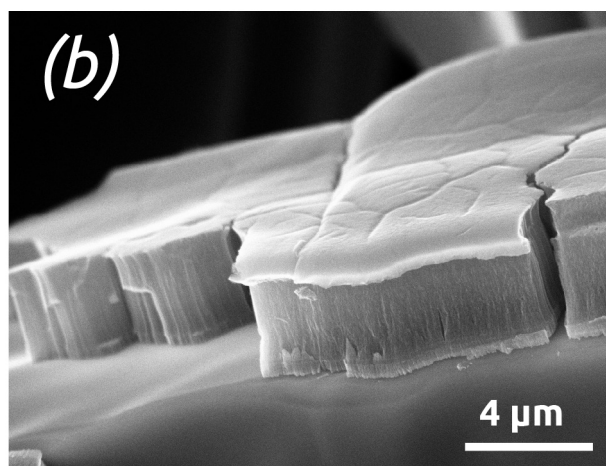

**Figure S2. Cross section views of Ti felts after anodization at 40 V, 2 h in glycerol +  $\text{NH}_4\text{F}$  0.5 wt-%.**
